# Supplementary material for: A Cross-Sectional Quantitative Study on Sexual and Reproductive Health Knowledge and Access to Services of Arab and Kurdish Syrian Refugee Young Women Living in an Urban Setting in Lebanon
Source: MDPI journal article supplement (doi:10.3390/ijerph18189586), 2021-09-11
Supplement: s1 [file s1]

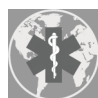

**Supplementary:**

*Additional file 1. SRH knowledge of Syrian refugee young women on four SRH topics*

**Table S1.** Identified STIs among Knowledgeable Participants ( $n = 136$ ).

|                | Number | Percentage (%) |
|----------------|--------|----------------|
| HIV/AIDS       | 136    | 100            |
| Hepatitis B    | 45     | 33             |
| Chlamydia      | 2      | 1.5            |
| Genital Herpes | 16     | 11.8           |
| Genital Warts  | 12     | 8.8            |
| Gonorrhea      | 8      | 5.9            |
| HPV            | 10     | 7.3            |

**Table S2.** Identified STIs Symptoms among Knowledgeable Participants ( $n = 236$ ).

|                                      | Number | Percentage (%) |
|--------------------------------------|--------|----------------|
| Abdominal pain                       | 66     | 28             |
| Green or curd-like vaginal discharge | 131    | 55.5           |
| Foul-smelling discharge              | 123    | 52.1           |
| Burning pain during urination        | 164    | 69.5           |
| Redness in genital area              | 65     | 27.5           |
| Genital ulcers or sores              | 66     | 28             |
| Genital itching                      | 167    | 70.7           |
| Pain during intercourse              | 52     | 22             |
| Loss of weight                       | 6      | 2.6            |
| Yellow eyes and skin                 | 3      | 1.3            |
| Hard to get pregnant                 | 17     | 7.2            |

**Table S3.** Identified Methods of Contraception among Knowledgeable Participants ( $n = 284$ ).

|                     | Number | Percentage (%) |
|---------------------|--------|----------------|
| Birth Control Pills | 268    | 94.3           |
| IUD                 | 266    | 93.6           |
| Male Condom         | 194    | 68.3           |
| Implant             | 100    | 35.2           |
| Patch               | 91     | 32             |
| Injection           | 105    | 37             |
| Emergency Pill      | 0      | 0              |
| Sterilization       | 167    | 58.8           |
| Calendar            | 148    | 52.1           |
| Withdrawal          | 257    | 90.4           |

**Table S4.** Identified Danger Signs of Pregnancy among Knowledgeable Participants ( $n = 231$ ).

|                            | Number | Percentage (%) |
|----------------------------|--------|----------------|
| Feeling very weak or tired | 45     | 19.5           |
| Severe abdominal pain      | 123    | 53.2           |
| Vaginal bleeding           | 199    | 86.1           |
| Fever                      | 116    | 50.2           |

---

|                            |    |      |
|----------------------------|----|------|
| Swelling of hands and face | 93 | 40.3 |
| Headache                   | 16 | 6.9  |
| Blurred vision             | 15 | 6.5  |
| Sudden water breaking      | 8  | 3.5  |
| Vomiting and Dizziness     | 13 | 5.6  |
| Infections                 | 4  | 1.7  |
| Hormonal Instability       | 1  | 0.4  |
| Pale Face                  | 1  | 0.4  |
| Absence of foetal movement | 1  | 0.4  |
| Low position of the foetus | 2  | 0.8  |

---
